# Supplementary material for: Jellyfish Modulate Bacterial Dynamic and Community Structure
Source: PubMed Central journal article supplement (PMC3379990; doi:10.1371/journal.pone.0039274), 2012-06-20
Supplement: pone.0039274.s001.pdf [file pone.0039274.s001.pdf]

**Table S1.** A two - way ANOVA without replication was performed to assess difference in the bacterial abundance, protein and ammonium (NH<sub>4</sub><sup>+</sup>) concentrations between jellyfish treatments (A, P, R) and the control (A). A Tukey HSD test of 95% confidence intervals was performed to compare individual time points (B).

**A) 2 - way ANOVA without replication**

**Abundance**

|                                   | <b>Df</b> | <b>F value</b> | <b>Pr(&gt;F)</b> |
|-----------------------------------|-----------|----------------|------------------|
| Treatment                         | 1         | 10.166         | 0.00657**        |
| Day                               | 5         | 7.489          | 0.00131**        |
| Residuals                         | 14        |                |                  |
| <b>NH<sub>4</sub><sup>+</sup></b> |           |                |                  |
| Treatment                         | 1         | 34.01          | 2.00E-05***      |
| Day                               | 5         | 3.811          | 0.0169*          |
| Residuals                         | 17        |                |                  |
| <b>Proteins</b>                   |           |                |                  |
| Treatment                         | 3         | 17.289         | 3.93E-05***      |
| Day                               | 5         | 1.411          | 0.276            |
| Residuals                         | 15        |                |                  |

**B) Tukey HSD test - P value**

| <b>Day</b> | <b>Abundance</b> | <b>NH<sub>4</sub><sup>+</sup></b> | <b>Proteins</b> |
|------------|------------------|-----------------------------------|-----------------|
| 1-0        | 0.999            | 0.999                             | 0.947           |
| 2-0        | 0.993            | 0.999                             | 0.999           |
| 3-0        | 0.249            | 0.996                             | 0.992           |
| 6-0        | 0.010            | 0.107                             | 0.809           |
| 9-0        | 0.010            | 0.217                             | 0.879           |
| 2-1        | 0.999            | 0.999                             | 0.813           |
| 3-1        | 0.376            | 0.981                             | 0.709           |
| 6-1        | 0.017            | 0.072                             | 0.323           |
| 9-1        | 0.017            | 0.152                             | 0.401           |
| 3-2        | 0.527            | 0.961                             | 0.999           |
| 6-2        | 0.029            | 0.056                             | 0.945           |
| 9-2        | 0.029            | 0.121                             | 0.975           |
| 6-3        | 0.401            | 0.238                             | 0.980           |
| 9-3        | 0.400            | 0.430                             | 0.993           |
| 9-6        | 1.000            | 0.998                             | 0.999           |
