# Supplementary material for: Jellyfish Modulate Bacterial Dynamic and Community Structure
Source: PubMed Central journal article supplement (PMC3379990; doi:10.1371/journal.pone.0039274), 2012-06-20
Supplement: pone.0039274.s002.pdf [file pone.0039274.s002.pdf]

**Table S2.** A two - way ANOVA with replication was performed to assess difference in the bacterial carbon production among all treatments (A, P, R and C) (**A**). A Tukey HSD test of 95% confidence intervals was performed to compare individual treatments (**B**) and to compare individual time points (**C**).

**A) 2 - way ANOVA with replication**

|                  | <b>Df</b> | <b>F value</b> | <b>Pr(&gt;F)</b> |
|------------------|-----------|----------------|------------------|
| <b>Treatment</b> | 3         | 46.59          | 7.52E-14***      |
| <b>Day</b>       | 5         | 596.78         | 2.00E-16***      |
| <b>Residuals</b> | 45        |                |                  |

**B) Tukey HSD test**

| <b>Treatment</b> | <b>P value</b> |
|------------------|----------------|
| A-C              | 0.000          |
| P-C              | 0.000          |
| R-C              | 0.000          |
| P-A              | 0.075          |
| R-A              | 0.897          |
| R-P              | 0.299          |

**C) Tukey HSD test**

| <b>Day</b> | <b>P value</b> |
|------------|----------------|
| 1-0        | 0.306          |
| 2-0        | 0.000          |
| 3-0        | 0.000          |
| 6-0        | 0.000          |
| 9-0        | 0.000          |
| 2-1        | 0.000          |
| 3-1        | 0.000          |
| 6-1        | 0.000          |
| 9-1        | 0.000          |
| 3-2        | 0.000          |
| 6-2        | 0.000          |
| 9-2        | 0.000          |
| 6-3        | 0.988          |
| 9-3        | 0.999          |
| 9-6        | 0.998          |
