# Supplementary material for: Jellyfish Modulate Bacterial Dynamic and Community Structure
Source: PubMed Central journal article supplement (PMC3379990; doi:10.1371/journal.pone.0039274), 2012-06-20
Supplement: pone.0039274.s003.pdf [file pone.0039274.s003.pdf]

**Table S3:** Bacterial clones from T0, C9, A9, P9 and R6 from 16S rRNA gene clone libraries from jellyfish-enrichment experiment in 2009 in the Gulf of Trieste with their accession numbers. In the table there is also a name and an accession number of the closest relative in GeneBank (NCBI) with % of similarity, family, taxon and isolation source.

| Treatment | Clone            | Acc. No. | Closest relative in GeneBank (NCBI), Acc. No.              | Similarity | Family            | Taxon | Source    |
|-----------|------------------|----------|------------------------------------------------------------|------------|-------------------|-------|-----------|
| T0        | JELLYFISH_T0_A8  | JQ432609 | Uncultured bacterium clone 3C003027, EU801675              | 100%       | SAR11             | Alpha | Sea water |
| T0        | JELLYFISH_T0_B3  | JQ432610 | Uncultured bacterium clone 6C232734, EU804774              | 99%        | SAR11             | Alpha | Sea water |
| T0        | JELLYFISH_T0_B5  | JQ432611 | Uncultured alpha proteobacterium clone ARTE4_216, GU230208 | 100%       | SAR11             | Alpha | Sea water |
| T0        | JELLYFISH_T0_B7  | JQ432612 | Uncultured Flavobacterium sp. TAI-2-81, AM259825           | 99%        | Flavobacteriaceae | Flavo | Sea water |
| T0        | JELLYFISH_T0_B8  | JQ432613 | Uncultured bacterium clone 3C003637, EU802209              | 100%       | SAR11             | Alpha | Sea water |
| T0        | JELLYFISH_T0_B9  | JQ432614 | Uncultured alpha proteobacterium clone SHAG416, GQ348854   | 99%        | SAR11             | Alpha | Sea water |
| T0        | JELLYFISH_T0_B11 | JQ432615 | Uncultured bacterium clone 3C003027, EU801675              | 100%       | SAR11             | Alpha | Sea water |
| T0        | JELLYFISH_T0_C4  | JQ432616 | Uncultured bacterium clone 2C228151, EU800158              | 99%        | SAR11             | Alpha | Sea water |
| T0        | JELLYFISH_T0_C5  | JQ432617 | Uncultured bacterium clone 1C226591, EU799038              | 99%        | Rhodospirillaceae | Alpha | Sea water |
| T0        | JELLYFISH_T0_C6  | JQ432618 | Uncultured alpha proteobacterium clone D13W_181, HM057775  | 99%        | SAR11             | Alpha | Sea water |
| T0        | JELLYFISH_T0_C12 | JQ432619 | Uncultured bacterium clone 2C228148, EU800155              | 100%       | SAR11             | Alpha | Sea water |
| T0        | JELLYFISH_T0_D1  | JQ432620 | Uncultured alpha proteobacterium clone SHAZ544, GQ349958   | 99%        | SAR11             | Alpha | Sea water |
| T0        | JELLYFISH_T0_D2  | JQ432621 | Uncultured bacterium clone F9P1210_S_C08, HQ671782         | 99%        |                   | Cyano | Sea water |
| T0        | JELLYFISH_T0_D4  | JQ432622 | Uncultured bacterium clone 1C226874, EU799293              | 99%        |                   | Gamma | Sea water |
| T0        | JELLYFISH_T0_D8  | JQ432623 | Uncultured alpha proteobacterium clone A13W_1, HM057605    | 99%        | SAR11             | Alpha | Sea water |
| T0        | JELLYFISH_T0_D10 | JQ432624 | Uncultured gamma proteobacterium HNA_I_100608-65, HM037612 | 99%        |                   | Gamma | Sea water |
| T0        | JELLYFISH_T0_E1  | JQ432625 | Uncultured alpha proteobacterium clone ARTE1_97, GU230205  | 99%        | SAR11             | Alpha | Sea water |
| T0        | JELLYFISH_T0_E4  | JQ432626 | Uncultured bacterium clone 6C232832, EU804865              | 99%        | SAR11             | Alpha | Sea water |
| T0        | JELLYFISH_T0_E5  | JQ432627 | Uncultured alpha proteobacterium clone ARTE9_401, GU230237 | 99%        | SAR11             | Alpha | Sea water |
| T0        | JELLYFISH_T0_E8  | JQ432628 | Uncultured bacterium clone 2C229509, EU801156              | 99%        | Methylophilaceae  | Beta  | Sea water |
| T0        | JELLYFISH_T0_E9  | JQ432629 | Uncultured bacterium clone 2C229516, EU801161              | 99%        | SAR11             | Alpha | Sea water |
| T0        | JELLYFISH_T0_F5  | JQ432630 | Uncultured Flavobacterium sp. TAI-2-81, AM259825           | 99%        | Flavobacteriaceae | Flavo | Sea water |
| T0        | JELLYFISH_T0_F6  | JQ432631 | Uncultured alpha proteobacterium clone ARTE1_97, GU230205  | 99%        | SAR11             | Alpha | Spong     |
| T0        | JELLYFISH_T0_F7  | JQ432632 | Uncultured bacterium clone 3C003583, EU802165              | 99%        | SAR11             | Alpha | Sea water |
| T0        | JELLYFISH_T0_F8  | JQ432633 | Uncultured alpha proteobacteria MB13F01, AY033325          | 99%        |                   | Alpha | Sea water |
| T0        | JELLYFISH_T0_F9  | JQ432634 | Uncultured gamma proteobacterium clone SHAB429, GQ348549   | 99%        |                   | Gamma | Sea water |
| T0        | JELLYFISH_T0_G3  | JQ432635 | Uncultured bacterium clone 2C228366, EU800317              | 98%        | SAR11             | Alpha | Sea water |
| T0        | JELLYFISH_T0_G5  | JQ432636 | Uncultured alpha proteobacterium clone ARTE1_97, GU230205  | 99%        | SAR11             | Alpha | Sea water |
| T0        | JELLYFISH_T0_G7  | JQ432637 | Uncultured bacterium clone 1C227739, EU800050              | 99%        | SAR11             | Alpha | Sea water |
| T0        | JELLYFISH_T0_G10 | JQ432638 | Uncultured Flexibacter sp. clone TAU-7-69, AM259764        | 99%        | Cytophagaceae     | Flavo | Sea water |
| T0        | JELLYFISH_T0_G11 | JQ432639 | Uncultured alpha proteobacterium clone ARTE1_97, GU230205  | 99%        | SAR11             | Alpha | Sea water |
| T0        | JELLYFISH_T0_G12 | JQ432640 | Uncultured alpha proteobacterium clone D13W_181, HM057775  | 99%        | SAR11             | Alpha | Sea water |
| T0        | JELLYFISH_T0_H2  | JQ432641 | Uncultured Flavobacteria bacterium Vis_St6_1272, FN433347  | 98%        | Flavobacteriaceae | Flavo | Sea water |
| T0        | JELLYFISH_T0_H5  | JQ432642 | Uncultured bacterium clone 3C003637, EU802209              | 100%       | SAR11             | Alpha | Sea water |
| T0        | JELLYFISH_T0_H8  | JQ432643 | Uncultured bacterium clone 3C003583, EU802165              | 99%        | SAR11             | Alpha | Sea water |
| T0        | JELLYFISH_T0_H11 | JQ432644 | Uncultured alpha proteobacterium clone ARTE1_210, GU230266 | 99%        | SAR11             | Alpha | Sea water |
| C9        | JELLYFISH_C9_A1  | JQ432652 | Uncultured bacterium clone 1C227226, EU799607              | 99%        | Flavobacteriaceae | Flavo | Sea water |
| C9        | JELLYFISH_C9_A2  | JQ432653 | Uncultured Bacteroidetes bacterium clone D13W_13, HM057748 | 99%        | Flavobacteriaceae | Flavo | Sea water |

|    |                  |          |                                                                 |      |                    |              |                      |
|----|------------------|----------|-----------------------------------------------------------------|------|--------------------|--------------|----------------------|
| C9 | JELLYFISH_C9_A3  | JQ432654 | Uncultured marine bacterium clone OS3BD103, JN233555            | 99%  |                    | Unclassified | Sea water            |
| C9 | JELLYFISH_C9_A4  | JQ432655 | Uncultured bacterium clone W1-58, FJ545543                      | 99%  | Methylophilaceae   | Beta         | Sea water            |
| C9 | JELLYFISH_C9_A6  | JQ432656 | Uncultured gamma proteobacterium, FM958463                      | 99%  |                    | Gamma        | H. guttulatus        |
| C9 | JELLYFISH_C9_A7  | JQ432657 | Uncultured bacterium isolate lagoon october 2007, FN435246      | 99%  | Alteromonadaceae   | Gamma        | Sea water            |
| C9 | JELLYFISH_C9_B1  | JQ432658 | Uncultured Flavobacteriaceae PEACE2006/69_P3, EU394565          | 98%  | Flavobacteriaceae  | Flavo        | Sea water            |
| C9 | JELLYFISH_C9_B2  | JQ432659 | Uncultured Cryomorpaceae PEACE2006/31_P3, EU394563              | 99%  | Flavobacteriaceae  | Flavo        | Sea water            |
| C9 | JELLYFISH_C9_B4  | JQ432660 | Uncultured Bacteroidetes bacterium clone D13W_13, HM057748      | 98%  | Flavobacteriaceae  | Flavo        | Sea water            |
| C9 | JELLYFISH_C9_B5  | JQ432661 | Uncultured bacterium clone 1C227741, EU800052                   | 99%  | Rhodobacteraceae   | Alpha        | Sea water            |
| C9 | JELLYFISH_C9_B7  | JQ432662 | Uncultured bacterium isolate inlet june 2008, FN435240          | 99%  |                    | Gamma        | Sea water            |
| C9 | JELLYFISH_C9_B9  | JQ432663 | Uncultured gamma proteobacterium clone 1, AM748176              | 99%  |                    | Gamma        | Sea water            |
| C9 | JELLYFISH_C9_B10 | JQ432664 | Polaribacter dokdonensis strain MED152, DQ481463                | 99%  | Flavobacteriaceae  | Flavo        | Sea water            |
| C9 | JELLYFISH_C9_B11 | JQ432665 | Marinomonas blandensis strain MED 121, DQ403809                 | 98%  | Oceanospirillaceae | Gamma        | Sea water            |
| C9 | JELLYFISH_C9_B12 | JQ432666 | Uncultured bacterium clone 2C229430, EU801108                   | 99%  | SAR11              | Alpha        | Sea water            |
| C9 | JELLYFISH_C9_C2  | JQ432667 | Uncultured bacterium clone 1C227672, EU799992                   | 99%  | Rhodobacteraceae   | Alpha        | Sea water            |
| C9 | JELLYFISH_C9_C4  | JQ432668 | Polaribacter dokdonensis strain MED152, DQ481463                | 99%  | Flavobacteriaceae  | Flavo        | Sea water            |
| C9 | JELLYFISH_C9_C5  | JQ432669 | Uncultured bacterium clone PH-C6, EF659435                      | 99%  | Rhodobacteraceae   | Alpha        | Sea water            |
| C9 | JELLYFISH_C9_C6  | JQ432670 | Uncultured bacterium clone W1-58, FJ545543                      | 99%  | Methylophilaceae   | Beta         | Sea water            |
| C9 | JELLYFISH_C9_C7  | JQ432671 | Uncultured bacterium clone 2C229430, EU801108                   | 99%  | SAR11              | Alpha        | Sea water            |
| C9 | JELLYFISH_C9_C8  | JQ432672 | Uncultured Rhodobacteraceae bacterium clone DS119, DQ234202     | 99%  | Rhodobacteraceae   | Alpha        | Sea water            |
| C9 | JELLYFISH_C9_C10 | JQ432673 | Uncultured bacterium isolate inlet june 2008, FN435248          | 99%  | Alteromonadaceae   | Gamma        | Sea water            |
| C9 | JELLYFISH_C9_C11 | JQ432674 | Uncultured bacterium clone 1C227214, EU799596                   | 99%  | Rhodobacteraceae   | Alpha        | Sea water            |
| C9 | JELLYFISH_C9_C12 | JQ432675 | Uncultured bacterium isolate inlet june 2008, FN435248          | 99%  | Alteromonadaceae   | Gamma        | Sea water            |
| C9 | JELLYFISH_C9_D1  | JQ432676 | Marinomonas blandensis strain MED 121, DQ403809                 | 98%  | Oceanospirillaceae | Gamma        | Sea water            |
| C9 | JELLYFISH_C9_D2  | JQ432677 | Uncultured alpha proteobacterium clone M0-Ar2-P4C08, EF016462   | 99%  | Rhodobacteraceae   | Alpha        | Sea water            |
| C9 | JELLYFISH_C9_D4  | JQ432678 | Uncultured bacterium clone 2C229430, EU801108                   | 99%  | SAR11              | Alpha        | Sea water            |
| C9 | JELLYFISH_C9_D5  | JQ432679 | Vibrio splendidus isolate PB1-10rrnA, EU091325                  | 99%  | Vibrionaceae       | Gamma        | Atlantic halibut fry |
| C9 | JELLYFISH_C9_D7  | JQ432680 | Uncultured Bacteroidetes bacterium clone M0-Ar2-P4F11, EF016482 | 100% | Flavobacteriaceae  | Flavo        | Sea water            |
| C9 | JELLYFISH_C9_D10 | JQ432681 | Uncultured bacterium clone 1C226862, EU799281                   | 98%  | SAR11              | Alpha        | Sea water            |
| C9 | JELLYFISH_C9_D12 | JQ432682 | Uncultured marine microorganism clone 4035AA_68, EU187996       | 99%  | SAR11              | Alpha        | Sea water            |
| C9 | JELLYFISH_C9_E2  | JQ432683 | Uncultured Bacteroidetes bacterium clone C8W_85, HM057654       | 99%  | Flavobacteriaceae  | Flavo        | Sea water            |
| C9 | JELLYFISH_C9_E6  | JQ432684 | Uncultured Bacteroidetes bacterium clone D13W_13, HM057748      | 99%  | Flavobacteriaceae  | Flavo        | Sea water            |
| C9 | JELLYFISH_C9_E7  | JQ432685 | Uncultured Alteromonas sp. clone F3C21, AY936195                | 99%  | Alteromonadaceae   | Gamma        | Sea water            |
| C9 | JELLYFISH_C9_E8  | JQ432686 | Uncultured bacterium isolate inlet june 2008, FN435248          | 99%  | Alteromonadaceae   | Gamma        | Sea water            |
| C9 | JELLYFISH_C9_E9  | JQ432687 | Uncultured bacterium clone 1C227710, EU800023                   | 99%  | Rhodobacteraceae   | Alpha        | Sea water            |
| C9 | JELLYFISH_C9_E10 | JQ432688 | Uncultured Bacteroidetes bacterium clone F3C31, AY794159        | 99%  | Flavobacteriaceae  | Flavo        | Sea water            |
| C9 | JELLYFISH_C9_E12 | JQ432689 | Uncultured bacterium clone 1C227018, EU799422                   | 99%  |                    | Gamma        | Sea water            |
| C9 | JELLYFISH_C9_F3  | JQ432690 | Uncultured Comamonadaceae bacterium clone DS173, DQ234255       | 99%  | Comamonadaceae     | Beta         | Sea water            |
| C9 | JELLYFISH_C9_F4  | JQ432691 | Uncultured bacterium clone 3C003501, EU802098                   | 99%  | SAR11              | Alpha        | Sea water            |
| C9 | JELLYFISH_C9_F5  | JQ432692 | Uncultured alpha proteobacterium clone C8W_100, HM057657        | 99%  | Rhodobacteraceae   | Alpha        | Sea water            |
| C9 | JELLYFISH_C9_F6  | JQ432693 | Uncultured bacterium clone 1C226600, EU799046                   | 99%  | Methylophilaceae   | Beta         | Sea water            |
| C9 | JELLYFISH_C9_F8  | JQ432694 | Uncultured bacterium clone 1C226805, EU799228                   | 99%  |                    | Gamma        | Sea water            |
| C9 | JELLYFISH_C9_F10 | JQ432695 | Uncultured bacterium clone 6C232873, EU804900                   | 99%  | SAR11              | Alpha        | Sea water            |
| C9 | JELLYFISH_C9_G1  | JQ432696 | Uncultured bacterium isolate inlet june 2008, FN435241          | 99%  | Alteromonadaceae   | Gamma        | Sea water            |
| C9 | JELLYFISH_C9_G2  | JQ432697 | Pseudoalteromonas sp. 'A1 isolate-2', EF474129                  | 100% | Pseudoalteromonada | Gamma        | Sea water            |
| C9 | JELLYFISH_C9_G3  | JQ432698 | Uncultured bacterium clone ZL1708, EU268118                     | 98%  |                    | Cyano        | Sea water            |
| C9 | JELLYFISH_C9_G6  | JQ432699 | Uncultured bacterium isolate inlet june 2008, FN435248          | 99%  | Alteromonadaceae   | Gamma        | Sea water            |
| C9 | JELLYFISH_C9_G7  | JQ432700 | Uncultured bacterium clone 1C226833, EU799255                   | 99%  | Methylophilaceae   | Beta         | Sea water            |

|    |                   |          |                                                                   |      |                    |       |                           |
|----|-------------------|----------|-------------------------------------------------------------------|------|--------------------|-------|---------------------------|
| C9 | JELLYFISH_C9_G8   | JQ432701 | Rhodobacteraceae bacterium IMCC1933, GQ468664                     | 99%  | Rhodobacteraceae   | Alpha | Sea water                 |
| C9 | JELLYFISH_C9_G10  | JQ432702 | Uncultured bacterium clone W2-57, FJ545632                        | 99%  | SAR11              | Alpha | Sea water                 |
| C9 | JELLYFISH_C9_G12  | JQ432703 | Uncultured bacterium isolate inlet june 2008, FN435240            | 99%  |                    | Gamma | Sea water                 |
| C9 | JELLYFISH_C9_H1   | JQ432704 | Uncultured prasinophyte clone OM5, U70715                         | 99%  |                    | Cyano | Sea water                 |
| C9 | JELLYFISH_C9_H5   | JQ432705 | Uncultured SAR86 cluster gamma proteobacterium clone 45, AM748220 | 99%  | SAR86              | Gamma | Sea water                 |
| C9 | JELLYFISH_C9_H6   | JQ432706 | Uncultured bacterium clone 3C003594, EU802174                     | 96%  |                    | Gamma | Sea water                 |
| C9 | JELLYFISH_C9_H7   | JQ432707 | Uncultured Bacteroidetes bacterium clone D13W_13, HM057748        | 98%  | Flavobacteriaceae  | Flavo | Sea water                 |
| C9 | JELLYFISH_C9_H8   | JQ432708 | Uncultured phototrophic eukaryote clone HE17, AY702176            | 98%  |                    | Cyano | Sea water                 |
| C9 | JELLYFISH_C9_H9   | JQ432709 | Uncultured bacterium clone ZL1708, EU268118                       | 99%  |                    | Cyano | Sea water                 |
| C9 | JELLYFISH_C9_H10  | JQ432710 | Rhodobacteraceae bacterium IMCC1933, GQ468664                     | 99%  | Rhodobacteraceae   | Alpha | Sea water                 |
| A9 | JELLYFISH_Au9_A8  | JQ432588 | Vibrio sp. Da4, AF242272                                          | 99%  | Vibrionaceae       | Gamma | Sea urchin                |
| A9 | JELLYFISH_Au9_B6  | JQ432589 | Vibrio tasmaniensis strain Mj28, GQ455006                         | 99%  | Vibrionaceae       | Gamma | Spider crab               |
| A9 | JELLYFISH_Au9_C1  | JQ432590 | Flavobacteriaceae bacterium G121102s2_3, AY353820                 | 98%  | Flavobacteriaceae  | Flavo | Diatom detritus           |
| A9 | JELLYFISH_Au9_D1  | JQ432591 | Vibrio splendidus isolate PB1-10rrnJ, EU091334                    | 99%  | Vibrionaceae       | Gamma | Atlantic halibut fry      |
| P9 | JELLYFISH_Pn9_A1  | JQ432592 | Shewanella kaireitica c931, AB094598                              | 98%  | Shewanellaceae     | Gamma | Sea sediment              |
| P9 | JELLYFISH_Pn9_A5  | JQ432593 | Pseudoalteromonas sp. 520P1, AB196167                             | 99%  | Pseudoalteromonada | Gamma | Sea water                 |
| P9 | JELLYFISH_Pn9_A7  | JQ432594 | Lacinutrix sp. MEBiC01653, EU581705                               | 98%  | Flavobacteriaceae  | Flavo | Sea sediment/ water       |
| P9 | JELLYFISH_Pn9_A8  | JQ432595 | Shewanella fidelia strain KMM3589, AF420313                       | 99%  | Shewanellaceae     | Gamma | Sea sediment              |
| P9 | JELLYFISH_Pn9_A10 | JQ432596 | Vibrio splendidus isolate PB1-10rrnE, EU091329                    | 99%  | Vibrionaceae       | Gamma | Atlantic halibut fry      |
| P9 | JELLYFISH_Pn9_B1  | JQ432597 | Pseudoalteromonas sp. 520P1, AB196167                             | 100% | Pseudoalteromonada | Gamma | Sea water                 |
| P9 | JELLYFISH_Pn9_B3  | JQ432598 | Bizionia sp. NF1-21, FJ889663                                     | 98%  | Flavobacteriaceae  | Flavo | Sea sediment              |
| P9 | JELLYFISH_Pn9_B10 | JQ432599 | Pseudoalteromonas sp. BSs20130, EU365507                          | 98%  | Pseudoalteromonada | Gamma | Sea sediment              |
| P9 | JELLYFISH_Pn9_B11 | JQ432600 | Pseudoalteromonas sp. 520P1, AB196167                             | 97%  | Pseudoalteromonada | Gamma | Sea sediment              |
| P9 | JELLYFISH_Pn9_C1  | JQ432601 | Bizionia sp. NF1-21, FJ889663                                     | 98%  | Flavobacteriaceae  | Flavo | Sea sediment              |
| P9 | JELLYFISH_Pn9_C3  | JQ432602 | Shewanella sp. B246, FN295778                                     | 99%  | Shewanellaceae     | Gamma | Bryozoa                   |
| P9 | JELLYFISH_Pn9_C5  | JQ432603 | Bizionia sp. NF1-21, FJ889663                                     | 98%  | Flavobacteriaceae  | Flavo | Sea sediment              |
| P9 | JELLYFISH_Pn9_C8  | JQ432604 | Pseudoalteromonas sp. BSw20106, EU365604                          | 98%  | Pseudoalteromonada | Gamma | Sea water                 |
| P9 | JELLYFISH_Pn9_D2  | JQ432605 | Pseudoalteromonas denitrificans strain MAR_121_B08_2010-01-20,    | 97%  | Pseudoalteromonada | Gamma | Sea water                 |
| P9 | JELLYFISH_Pn9_D10 | JQ432606 | Shewanella fidelia strain KMM3589, AF420313                       | 99%  | Shewanellaceae     | Gamma | Sea sediment              |
| P9 | JELLYFISH_Pn9_D11 | JQ432607 | Uncultured gamma proteobacterium clone PM1-19, EF215793           | 99%  | Oceanospirillaceae | Gamma | Artificial surface in sea |
| P9 | JELLYFISH_Pn9_D12 | JQ432608 | Bizionia sp. NF1-21, FJ889663                                     | 98%  | Flavobacteriaceae  | Flavo | Sea sediment              |
| R6 | JELLYFISH_Rp6_E1  | JQ432645 | Pseudoalteromonas sp. B199b, FN295769                             | 99%  | Pseudoalteromonada | Gamma | Bryozoa                   |
| R6 | JELLYFISH_Rp6_E7  | JQ432646 | Pseudoalteromonas sp. 12, DQ642815                                | 99%  | Pseudoalteromonada | Gamma | Laminaria japonica        |
| R6 | JELLYFISH_Rp6_F5  | JQ432647 | Uncultured Vibrionaceae bacterium clone MS-C128, FJ949311         | 99%  | Vibrionaceae       | Gamma | Calcareous sandy          |
| R6 | JELLYFISH_Rp6_F10 | JQ432648 | Pseudoalteromonas sp. SM0524, EU548075                            | 99%  | Pseudoalteromonada | Gamma | Decaying brown alge       |
| R6 | JELLYFISH_Rp6_G1  | JQ432649 | Pseudoalteromonas sp. BSw20040, EU365563                          | 100% | Pseudoalteromonada | Gamma | Sea water                 |
| R6 | JELLYFISH_Rp6_G3  | JQ432650 | Pseudoalteromonas sp. 520P1, AB196167                             | 100% | Pseudoalteromonada | Gamma | Unknown                   |
| R6 | JELLYFISH_Rp6_H10 | JQ432651 | Pseudoalteromonas sp. BCw097, FJ889597                            | 100% | Pseudoalteromonada | Gamma | Sea water                 |
